# Supplementary figures and images for: Endangered Nectar-Feeding Bat Detected by Environmental DNA on Flowers
Source: MDPI journal article supplement (doi:10.3390/ani12223075), 2022-11-08

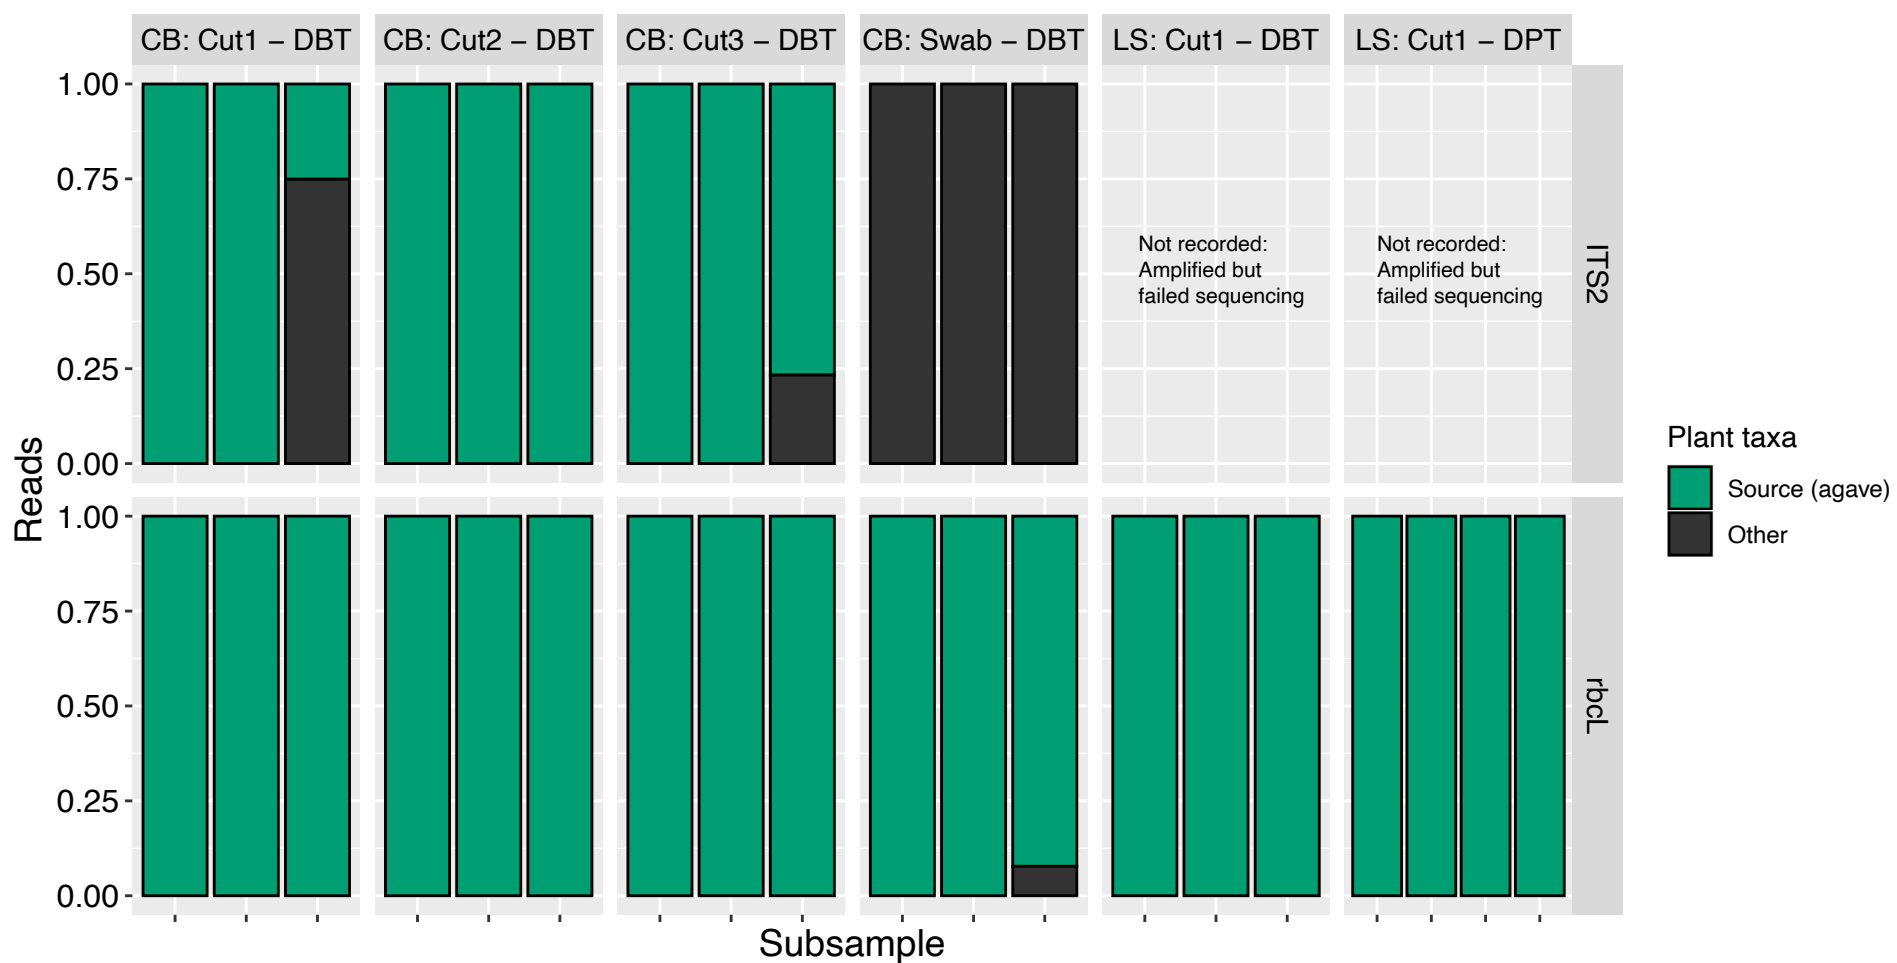

Supplement: s1 [file s1]
